# Supplementary material for: Secondary Intracranial Tumors Following Radiotherapy for Pituitary Adenomas: A Systematic Review
Source: Cancers (Basel). 2017 Aug 8;9(8):103. doi: 10.3390/cancers9080103 (PMC5575606; doi:10.3390/cancers9080103)
Supplement: Supplementary file 1 [file cancers-09-00103-s001.xlsx]

## Sheet: Sheet1
Supplementary Table S1. Radiation-induced secondary intracranial tumor following radiotherapy for pituitary adenomas.
Authors	Year	Age	Gender	Pituitary adenoma tyoe	IR dose (Gy)	Ream energy	IR technique	Latency (years)	Histology of Secondary tumor	Site of Secondary tumor	Therapy	OS (months)
Terry	1959	26	F	NF	65	200kV, 400kV	3-field technique	12	fibrosarcoma	sellar region	Ope	5
Terry	1959	42	M	NF	40.2	250kV, 60Co	3-field technique	5	fibrosarcoma	sellar region	Ope	2.5
Terry	1959	46	F	NF	75	200kV	3-field technique	8	fibrosarcoma	sellar region	Ope	0.75
Meredith	1960	51	F	NF	20	200kV	3-field technique	6	osteogenic sarcoma	temporal	Ope	0.03
Newton	1962	39	F	GH	39.1	1000kV, 200kV	lateral opposing field	10	fibrosarcoma	sellar region	Ope, IR	7
Goldberg	1963	30	F	GH	23.25	200kV	3-field technique	19	hemangioendothelioma	sellar region	Biop	48
Goldberg	1963	28	F	GH	39.4	1000kV, 200kV	lateral opposing field	10	fibrosarcoma	sellar region	Biop	12
Goldberg	1963	31	F	GH	42	1000kV	3-field technique	20	sarcoma	sellar region	Biop	0.25
Greenhouse	1964	24	F	GH	80	high voltage X-ray	N.D.	7	fibrosarcoma	sellar region	Ope	1
Walz & Brownell	1966	42	M	NF	40	250kV	rotational technique	5	fibrosarcoma	sellar region	Ope	6
Walz & Brownell	1966	38	M	NF	35	250kV	rotational technique	8	fibrosarcoma	sellar region	Biop	0.06
Chang & Poole	1967	N.D.	N.D.	N.D.	N.D.	N.D.	N.D.	27	sarcoma	N.D.	N.D.	N.D.
Wright	1970	N.D.	N.D.	GH	N.D.	N.D.	N.D.	14	fibrosarcoma	sellar region	N.D.	N.D.
Lawrence	1970	N.D.	M	GH	0.3	900MeV heavy particle beams	rotational technique	11	meningioma	N.D.	(-)	N.D.
Miura	1970	29	F	ACTH	68	60Co	N.D.	4	GBM	frontal	(-)	N.D.
Sparagana	1972	29	M	NF	100.37	200-250kV	3-field technique	21	osteogenic sarcoma	frontal bone	Ope	5
Bogdanowicz & Sachs	1974	16	F	GH	61.14	N.D.	N.D.	16	meningothelial meningioma	petrous ridge	Ope	N.D.
Stock	1975	15	M	GH	70	60Co	3-field technique	21	fibroblastic meningioma	parasellar, middle cranial fossa	(-)	0
Amine & Sugar	1976	16	F	N.D.	51	betatron	N.D.	10	osteogenic sarcoma	sellar region	Ope, VP-shunt	1.25
Gonzalez-Vitale	1976	26	M	NF	50	N.D.	N.D.	11	malignant fibrous histiocytoma	sellar region	VP-shunt	0
Powell	1977	52	M	N.D.	50	60Co	N.D.	13	fibrosarcoma	sellar region	Ope	4
Ahmad & Fayos	1978	56	M	NF	40.92	60Co	lateral opposing field	10	fibrosarcoma	sellar region	Biop	6
Coppeto & Roberts	1979	46	M	GH	100	proton	SRS	8	fibrosarcoma	sellar region	Biop, IR	1
Shin	1980	34	F	PRL	101.5	N.D.	lateral opposing field	11	fibrosarcoma	sellar region	Ope	8
Martin	1980	18	F	NF	45	Linac, 8MeV	3-field technique	5	fibrosarcoma	sellar region	Ope	0.75
Vikhert	1980	43	N.D.	GH	101	N.D.	N.D.	12	fibrosarcoma	sellar region	N.D.	N.D.
Vikhert	1980	58	N.D.	NF	120	N.D.	N.D.	13	fibrosarcoma	sellar region	N.D.	N.D.
Vikhert	1980	50	N.D.	GH	N.D.	N.D.	N.D.	8	fibrosarcoma	sellar region	N.D.	N.D.
Pieterse	1982	48	M	NF	45	N.D.	N.D.	20	sarcoma	sellar region	Ope	1
Spallone	1982	29	F	NF	57.8	250kV	rotational technique	15	fibroblastic meningioma	parasellar	Ope	N.D.
Spallone	1982	23	F	GH	54.3	250kV	rotational technique	13	fibroblastic meningioma	frontal base	Ope	N.D.
Yang	1982	27	F	N.D.	123.74	N.D.	N.D.	22	meningioma (malignant)	sphenoid ridge	Ope	N.D.
Piatt	1983	38	M	GH	49	60Co	lateral opposing field	14	GBM	fronto-tempo	Ope	9
Shi	1984	54	M	NF	50	60Co	lateral opposing field	8	fibrosarcoma	sellar region	Ope	5
Kolodny & Dluhy	1985	23	M	NF	40	N.D.	N.D.	20.4	meningioma	middle temporal fossa	Ope	N.D.
Okamoto	1985	39	F	NF	50	60Co	lateral opposing field	5	GBM	temporal	Ope	14
Pages	1986	23	M	N.D.	54	N.D.	lateral opposing field	27	fibrochondrosarcoma	temporal	Ope	14+
Marus	1986	52	F	GH	45	60Co	N.D.	6	anaplastic astrocytoma	frontal	Ope	2
Huang	1987	26	M	GH	66	60Co	3-field technique	12	oligodendroglioma	temporal	Ope	N.D.
Kasantikul	1988	26	M	PRL	47	60Co	N.D.	8	meningioma	sellar	Ope	6+
Hufnagel	1988	29	M	PRL	55	4.6 MeV	N.D.	8	anaplastic astrocytoma	chiasm	Biop	3
Dierssen	1988	28	F	GH	60	N.D.	N.D.	6	GBM	frontal	Ope	11
Romero	1989	28	F	NF	45	N.D.	N.D.	9	malignant fibrous histiocytoma	fronto-temporal	Ope	N.D.
Amendola	1989	45	M	N.D.	40	60Co	N.D.	10	fibrosarcoma	sellar region	N.D.	N.D.
sridhar	1989	N.D.	F	N.D.	N.D.	N.D.	N.D.	33	meningothelial meniingioma	sellar region	Ope	12
shapiro	1989	27	M	NF	95	N.D.	3-field technique	22	GBM	temporal	Ope, IR, Chem	18+
Zampieri	1989	45	F	GH	50	60Co	lateral opposing field	8	anaplastic astrocytoma	temporal	Ope	3
Suda	1989	38	F	GH	50	60Co	lateral opposing field	4.5	anplastic astrocytoma	temporal	Ope, IR, Chem	10
Sato	1990	40	M	PRL	40	60Co	N.D.	9	fibrosarcoma	sellar region	Ope, IR	9
Partington	1990	26	M	ACTH	44.8	N.D.	N.D.	8	meningothelial meniingioma	sellar region	Ope	2+
Jones	1991	34	M	NF	40	N.D.	N.D.	28	grade Ⅲ	temporal lobe	Biop, IR	2
Jones	1991	47	F	GH	45	MeV	3-field technique	12	GBM	temporal	Ope, IR	12
Sugita	1992	58	F	GH	50	Linac	lateral opposing field	7	osteogenic sarcoma	fronto-temporal	Ope, Chem	13+
Brada	1992	48	F	N.D.	N.D.	N.D.	3-field technique	10	sarcoma	base	N.D.	N.D.
Brada	1992	19	F	N.D.	N.D.	N.D.	3-field technique	10	meningioma	spenoidal	N.D.	N.D.
Brada	1992	58	F	N.D.	N.D.	N.D.	3-field technique	21	meningioma	temporal	N.D.	N.D.
Tamura	1992	43	F	GH	60	N.D.	lateral opposing field	14	anaplastic astrocytoma	temporal	Ope, IR, Chem	13
Brada	1992	54	M	N.D.	N.D.	N.D.	3-field technique	6	GBM	frontal	N.D.	N.D.
Brada	1992	40	F	N.D.	N.D.	N.D.	3-field technique	7	GBM	temporal	N.D.	N.D.
Hodges	1992	24	F	PRL	60	60Co	N.D.	10	GBM	frontal	Ope	N.D.
Hodges	1992	47	F	PRL	60	60Co	N.D.	9	GBM	fronto-parietal	Ope	N.D.
Tsang	1993	34	F	GH	42.5	N.D.	N.D.	10	GBM	temporal	Ope, IR	19
Tsang	1993	42	M	NF	50	N.D.	N.D.	15	GBM	pons	Biop	2
Tsang	1993	38	M	PRL	50	N.D.	N.D.	8	anaplastic astrocytoma	fronto-parietal	Ope, IR	23
Salvati	1994	33	M	N.D.	44	N.D.	N.D.	12	fibroblastic osteosarcoma	base	Ope, IR	16
Chang	1995	60	N.D.	N.D.	35	N.D.	N.D.	11	fibrosarcoma	sellar region	Ope, IR	15
Musa	1995	59	F	N.D.	N.D.	N.D.	N.D.	27	meningioma	pterional	Ope	N.D.
Niwa	1996	24	M	GH	N.D.	60Co	N.D.	23	leiomyosarcoma	sellar region	Ope	96
Ahmed	1997	42	M	GH	50.4	Linac,8MeV	lateral opposing field	6.7	fibrosarcoma	sellar region	Ope	N.D.
Rao	1997	27	M	NF	67	N.D.	N.D.	16	meningothelial meniingioma	sellar region	Ope	N.D.
Chauveinc	1997	17	F	NF	100	N.D.	3-field technique	30	meningioma	convexiity, parasellar	Ope	3
Salvati	1997	24	F	N.D.	50	60Co	rotational technique	18	meningothelial meniingioma	parasaggital	Ope	108+
Salvati	1997	20	M	N.D.	50	60Co	rotational technique	21	fibroblastic meningioma	falx	Ope	60+
Nishio	1998	22	F	N.D.	45	N.D.	N.D.	18	malignant fibrous histiocytoma	sellar region	Ope	0.25
Nishio	1998	30	F	ACTH	45.5	N.D.	N.D.	24	meningioma	temporal	Ope	120+
Simmons	1998	17	M	GH+PRL	50	conventional	lateral opposing field	11	GBM	temporal	Ope	12
Simmons	1998	23	F	GH	45	N.D.	lateral opposing field	18	GBM	temporal	Ope	N.D.
Alexander	1998	22	M	NF	30.5	EBRT	3-field technique	31	ependymoma	caudate	Biop	N.D.
Nishio	1998	40	F	N.D.	50	N.D.	N.D.	12.5	anaplastic astrocytoma	frontal, temporal	Ope, Chem	10+
Dallasta	1999	35	M	NF	N.D.	N.D.	N.D.	8	fibrosarcoma	sellar region	Ope	8
Brat	1999	45	M	N.D.	45	N.D.	N.D.	15	GBM	frontal	N.D.	N.D.
kato	2000	34	F	NF	50	N.D.	lateral opposing field	20	GBM	temporal, pons	Ope	1
Hill	2001	27	M	NF	45	N.D.	lateral opposing field	15	GBM	thalamus, leptomeningeal	Biop, IR, Chem	16
Gnanalingham	2002	67	F	NF	52.2	60Co	3-field technique	14	fibrosarcoma	sellar region	Ope	N.D.
Gnanalingham	2002	67	F	NF	52.2	60Co	3-field technique	18	fibrosarcoma, osteosarcoma	sellar region	Ope	48
Osipov	2002	38	M	N.D.	54	4MeV	N.D.	10	meningeal osteosarcoma	calvaria	Ope, IR	18
Santoro	2002	18	M	NF	41	60Co	lateral opposing field	30	atypical meningioma	tentorial	Ope	21
Prabbu	2003	21	M	GH	50	high energy photons	lateral opposing field	5	fibrosarcoma	sellar region	Ope, Chem	11
Loeffler	2003	41	M	GH	87	protons	SRS	16	meningioma	tuberculum sellae	Ope	N.D.
Salvati	2003	33	F	NF	50	N.D.	N.D.	16	transitional meningioma	clinoidal	Ope	N.D.
Bembo	2004	39	M	NF	46.8	Linac 15MeV	3-field technique	6	osteogenic sarcoma	base	Ope	1.5
Minniti	2004	54	M	NF	N.D.	N.D.	N.D.	6	astrocytoma	frontal	N.D.	N.D.
Minniti	2004	39	F	NF	N.D.	N.D.	N.D.	7	astrocytoma	N.D.	N.D.	N.D.
Minniti	2004	40	F	NF	N.D.	N.D.	N.D.	9	astrocytoma	temporal	N.D.	N.D.
Minniti	2004	51	M	GH	N.D.	N.D.	N.D.	6	astrocytoma	N.D.	N.D.	N.D.
Minniti	2004	31	M	NF	45	N.D.	N.D.	6	PNET	frontal	N.D.	N.D.
Minniti	2005	48	F	NF	45	N.D.	N.D.	7	malignant meningeal sarcoma	sellar region	N.D.	N.D.
Minniti	2005	22	M	NF	N.D.	N.D.	N.D.	34	meningioma	N.D.	N.D.	N.D.
Minniti	2005	19	F	GH	N.D.	N.D.	N.D.	10	meningioma	sphenoid ridge	N.D.	N.D.
Minniti	2005	22	F	N.D.	N.D.	N.D.	N.D.	22	meningioma	N.D.	N.D.	N.D.
Minniti	2005	39	F	NF	N.D.	N.D.	N.D.	29	meningioma	N.D.	N.D.	N.D.
Minniti	2005	58	F	N.D.	N.D.	N.D.	N.D.	21	meningioma	temporal	N.D.	N.D.
Toh	2007	23	F	N.D.	60	N.D.	3-field technique	17	leiomyosarcoma	temporal	Ope	1.5
Snead	2008	N.D.	N.D.	NF	N.D.	N.D.	3-field technique	12	GBM	N.D.	N.D.	N.D.
Wu-Chen	2009	9	F	NF	N.D.	N.D.	N.D.	28	sarcoma	sellar region	Biop, Chem	3
Kondziolla	2009	35.4	M	N.D.	18	N.D.	SRS	33.6	meningioma	cavernous sinus	Ope, IR	46+
Wu-Chen	2009	39	M	NF	54	N.D.	N.D.	23	anaplastic astrocytoma	optic chiasma	Ope	84
Alexandru	2010	22	M	N.D.	N.D.	N.D.	N.D.	26	fibrosarcoma	brainstem	Ope, Chem	6
Berkmann	2010	31	M	GH	46.6	25MeV	SRS	7	fibrosarcoma	sellar region	Ope, IR	9.5
Norberg	2010	38	F	GH	44	N.D.	rotational technique	26	GBM	N.D.	N.D.	N.D.
Norberg	2010	55	M	NF	40	N.D.	lateral opposing field	7	anaplastic astrocytoma	N.D.	N.D.	N.D.
Norberg	2010	34	M	NF	38	N.D.	lateral opposed field	31	meningioma	N.D.	N.D.	N.D.
Norberg	2010	46	M	GH	45	N.D.	lateral opposed field	9	meningioma	N.D.	N.D.	N.D.
Norberg	2010	54	M	NF	41	N.D.	rotational technique	24	meningioma	N.D.	N.D.	N.D.
Norberg	2010	58	M	NF	26	N.D.	4-field technique	10	meningioma	N.D.	N.D.	N.D.
Sattler	2012	42	M	NF	50	N.D.	N.D.	14	meningioma	fronto-parietal	Ope	132+
Sattler	2012	36	F	GH	50	N.D.	N.D.	20	meningioma	sellar region	N.D.	108+
Sedney	2012	37	M	N.D.	50	EBRT	N.D.	25	sarcoma	sellar region	Ope	0.5
Yamada	2012	75	F	NF	50	N.D.	N.D.	20	osteosarcoma	base	Ope, IR, Chem	24
Sasagawa	2013	24	F	GH	24	gamma knife	SRS	15	sarcoma	sellar region	Ope, IR, Chem	15
Zhou	2013	36	M	NF	30	N.D.	N.D.	31	meningothelial meniingioma	fronto-temporal convexity, frontal base	Ope	1+
Kon	2013	16	F	NF	50	N.D.	lateral opposing field	22	fibroblastic meningioma	temporal middle fossa	Ope	130
Kon	2013	16	F	NF	50	N.D.	lateral opposing field	30	GBM	temporal	Ope, Chem	26
Guo	2014	68	F	NF	N.D.	N.D.	N.D.	19	MPNST	sellar region	Ope	4+
Sarkar	2014	31	F	ACTH	50.4	EBRT	3-field technique	6	GBM	N.D.	Biop, Chem	N.D.
van Varsseveld	2015	57	M	NF	51	N.D.	N.D.	12	malignant glioma	N.D.	N.D.	N.D.
van Varsseveld	2015	33	M	NF	45	N.D.	N.D.	27	meningioma	N.D.	N.D.	N.D.
van Varsseveld	2015	17	F	NF	44	N.D.	N.D.	42	meningioma	N.D.	N.D.	N.D.
Abbound	2015	17	N.D.	GH	50.4	EBRT	3-field technique	7.5	grade Ⅲ	pons	Biop	1.2
Burman	2017	76	F	PRL	N.D.	N.D.	N.D.	6	anaplastic oligodendroglioma	N.D.	N.D.	N.D.
Burman	2017	35	F	NF	N.D.	N.D.	N.D.	6	oligodendroglioma	N.D.	N.D.	N.D.
Burman	2017	62	M	NF	N.D.	N.D.	N.D.	7	astrocytoma	N.D.	N.D.	N.D.
Burman	2017	54	M	NF	N.D.	N.D.	N.D.	10	high grade glioma	N.D.	N.D.	N.D.
Burman	2017	44	M	TSH	N.D.	N.D.	N.D.	14	glioma	N.D.	N.D.	N.D.
Burman	2017	64	F	GH	N.D.	N.D.	N.D.	35	GBM	N.D.	N.D.	N.D.
Burman	2017	66	M	PRL	N.D.	N.D.	N.D.	45	ependymoma	N.D.	N.D.	N.D.
Burman	2017	37	M	PRL	N.D.	N.D.	N.D.	27	neuroblastoma	frontal	N.D.	N.D.
ACTH: cushing disease, Biop: biopsy, Chem: chemotherapy, EBRT: external beam radiotherapy, GBM: glioblastoma, GH: acromegaly, IR: irradiation, MeV: megavoltage, MPNST: malignant peripheral nerve sheath tumor, N.D.: not determined, NF: non-functional pituitary adenoma, OS: overall survival, PNET: primitive neuroectodermal tumor, PRL: prolactinoma, Ope: Total or subtotal removal, SRS: stereotactic …
